# Supplementary material
Source: Springer Nature journal article supplement (https://www.springermedizin.de/resource/supplementary/13054_2013_1895_MOESM3_ESM.pdf/9711886)

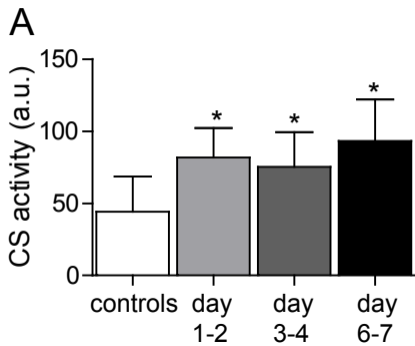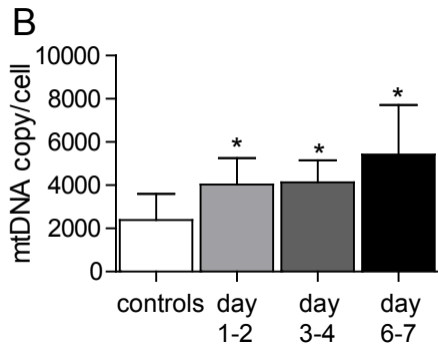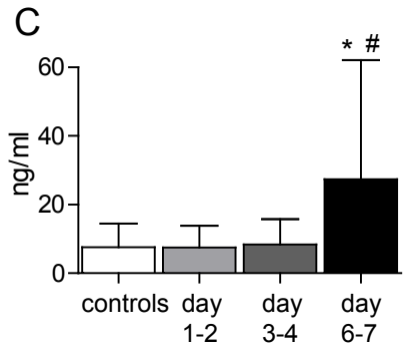

Supplement: MOESM3 [file 9711886]
